# Supplementary material
Source: ML conference proceedings conference paper supplement (https://openreview.net/forum?id=3FdIUbIjXb)

Coverage

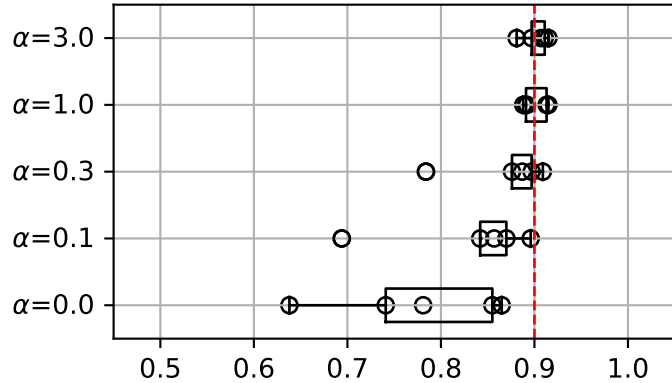

Length

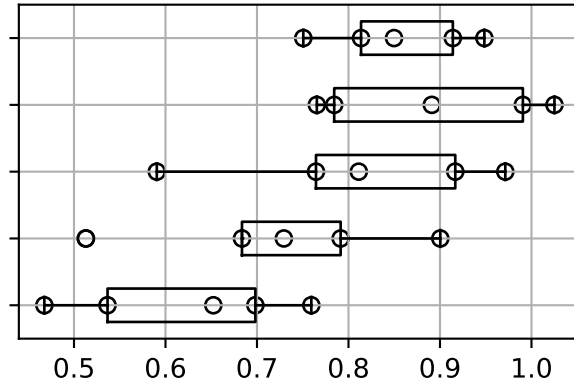

MSE

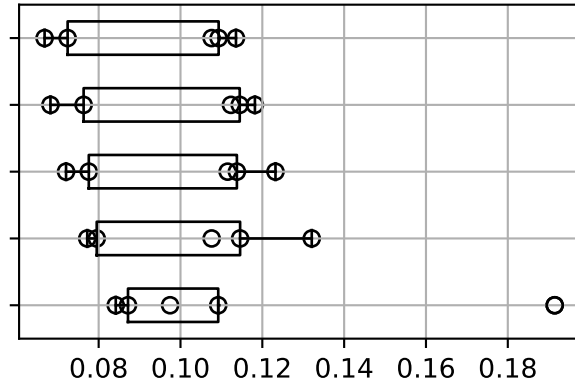

Supplement: supplementary_material [file bt.pdf › lcp-neurips_2025/results/figures/bt.pdf]

Coverage

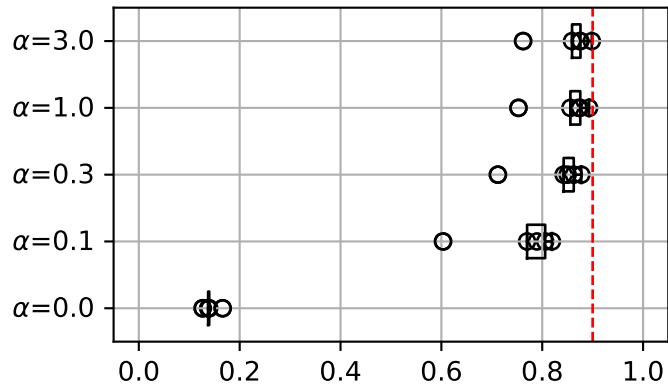

Length

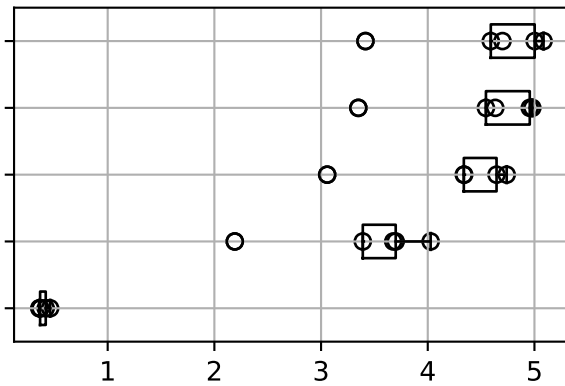

MSE

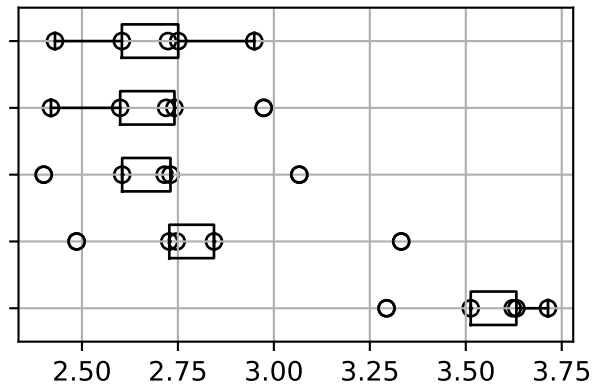

Supplement: supplementary_material [file llm.pdf › lcp-neurips_2025/results/figures/llm.pdf]

Coverage

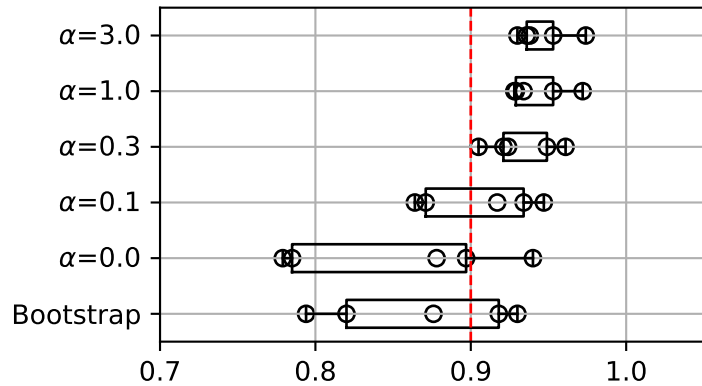

Length

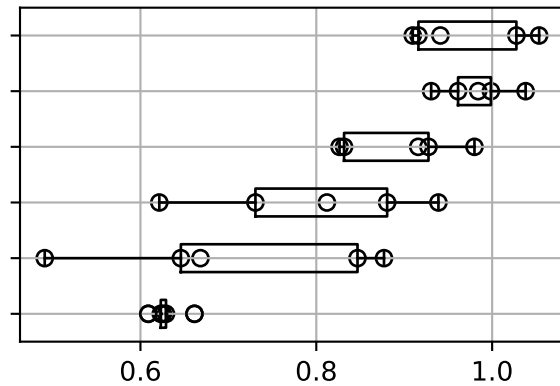

MSE

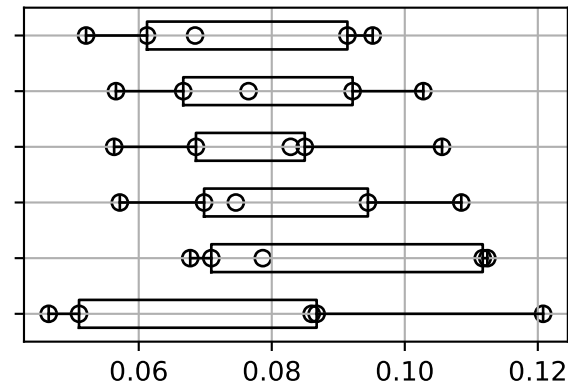

Supplement: supplementary_material [file lr.pdf › lcp-neurips_2025/results/figures/lr.pdf]
